# Supplementary material
Source: PubMed Central journal article supplement (PMC10439789)

Figure S1A

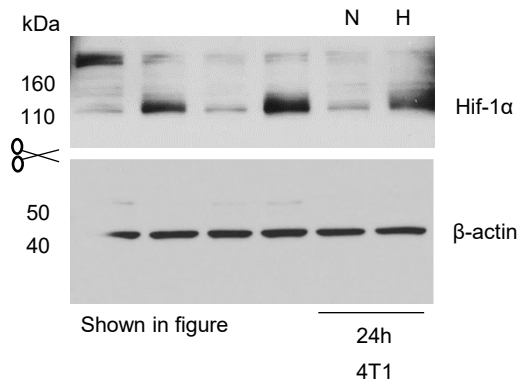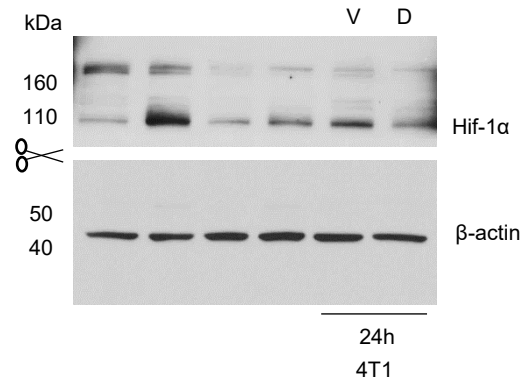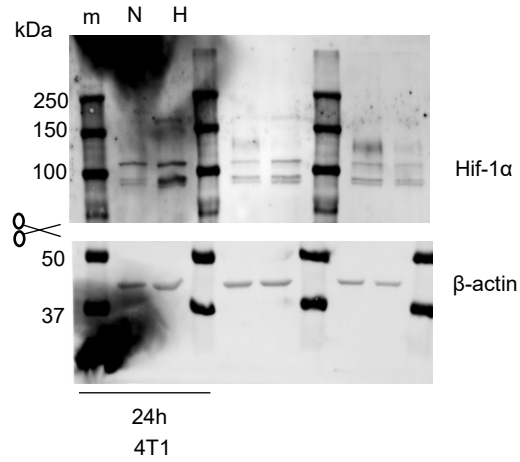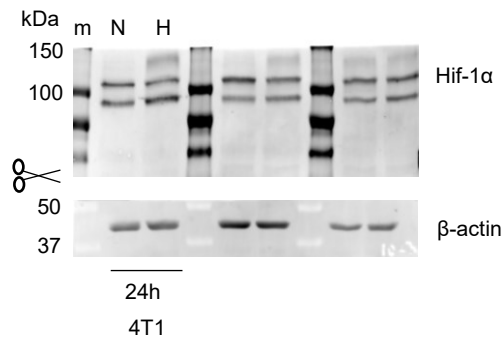

Figure S1A

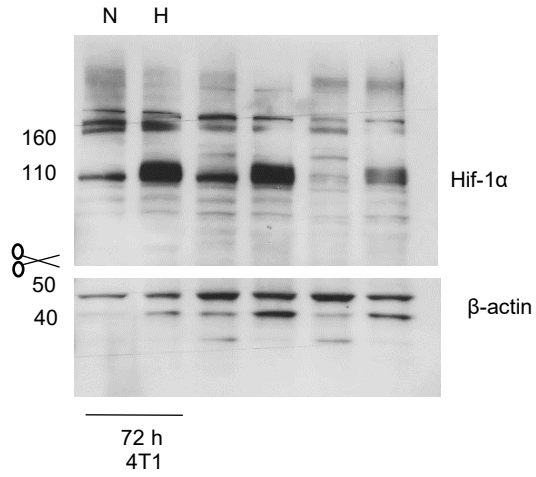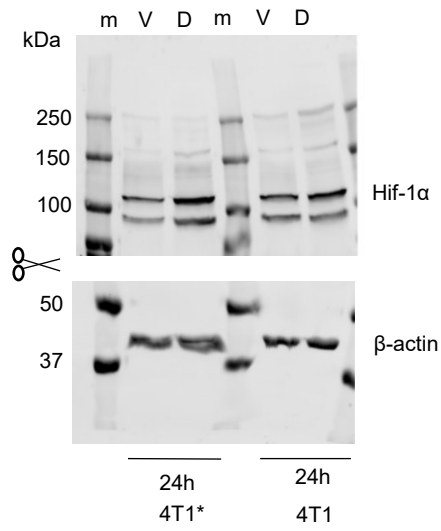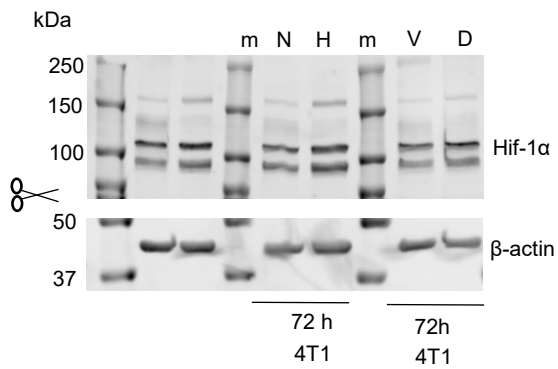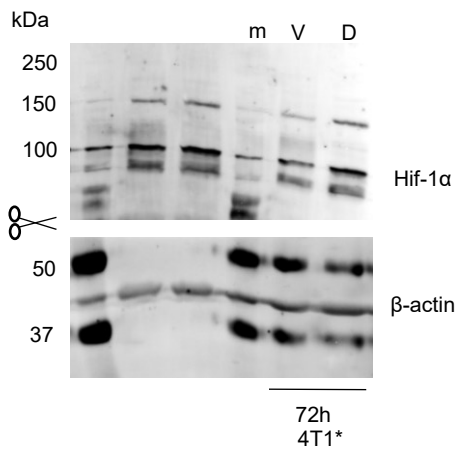

Figure S1A

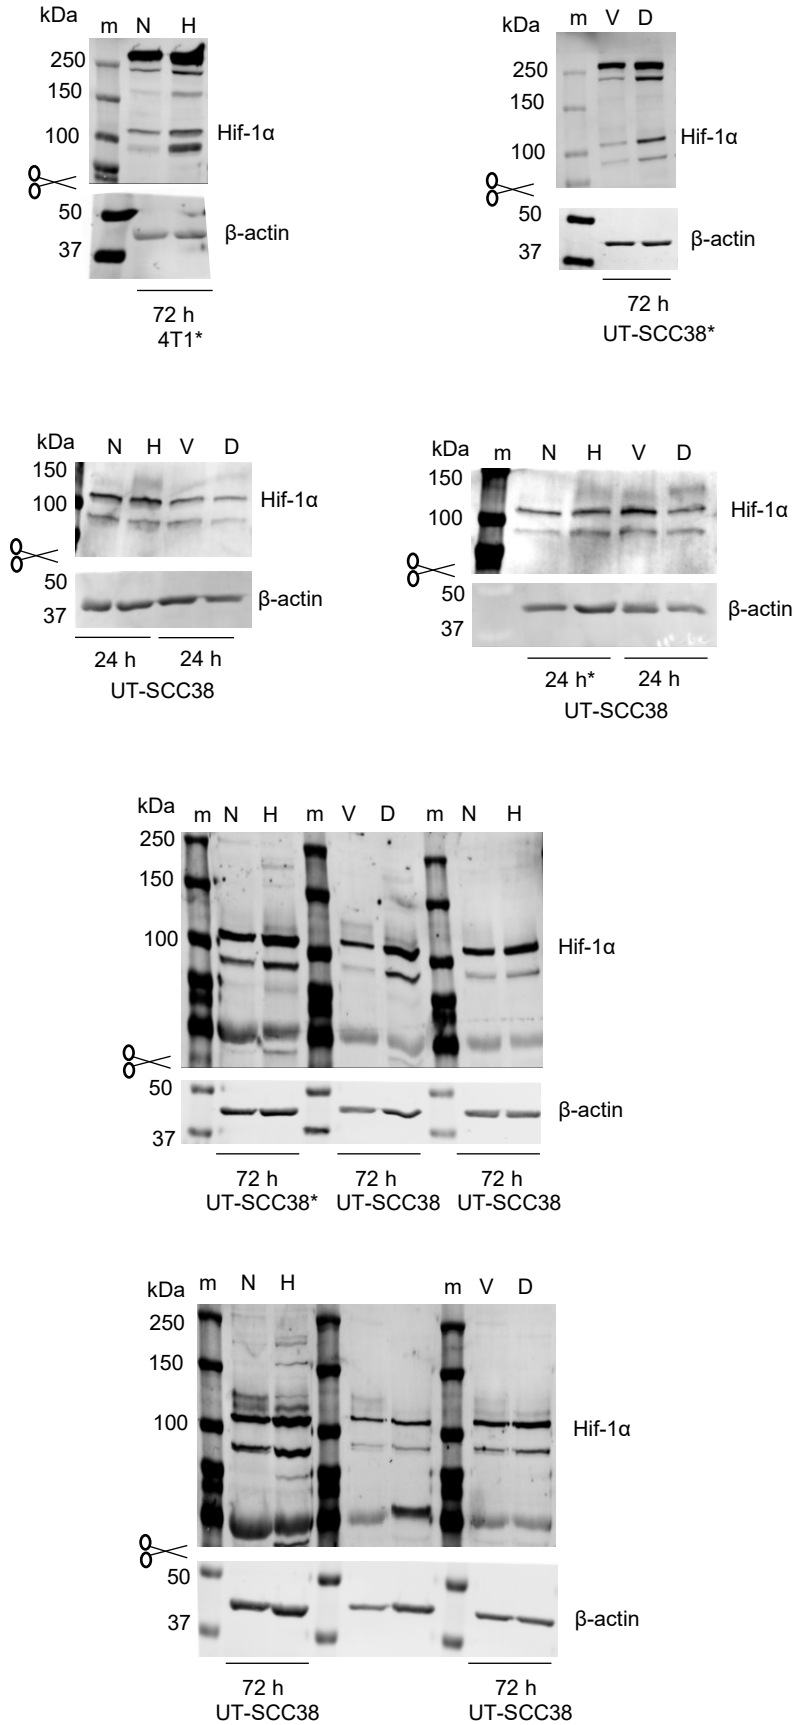

Abbreviations: N, normoxia; H, hypoxia; V, DMSO; D, DMOG; m, protein marker; \*, shown in figure, ✂, membrane cut

Figure 2B

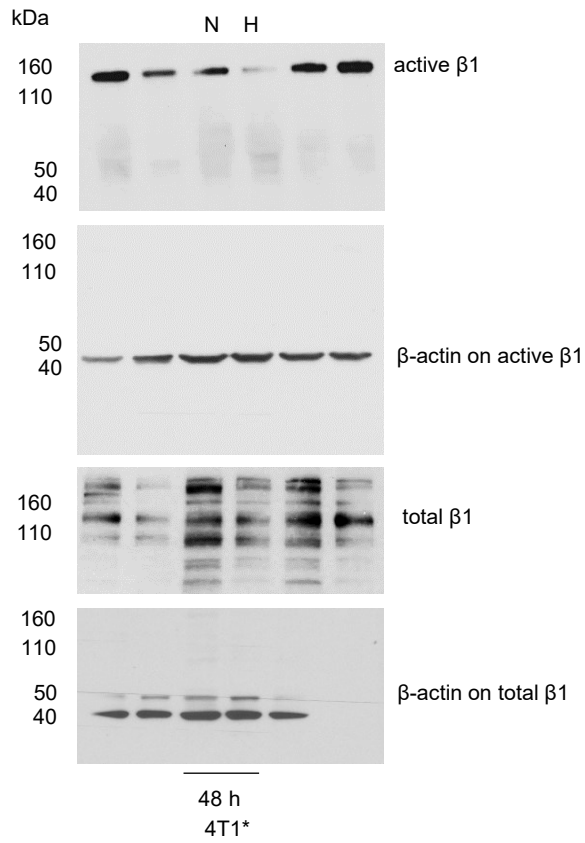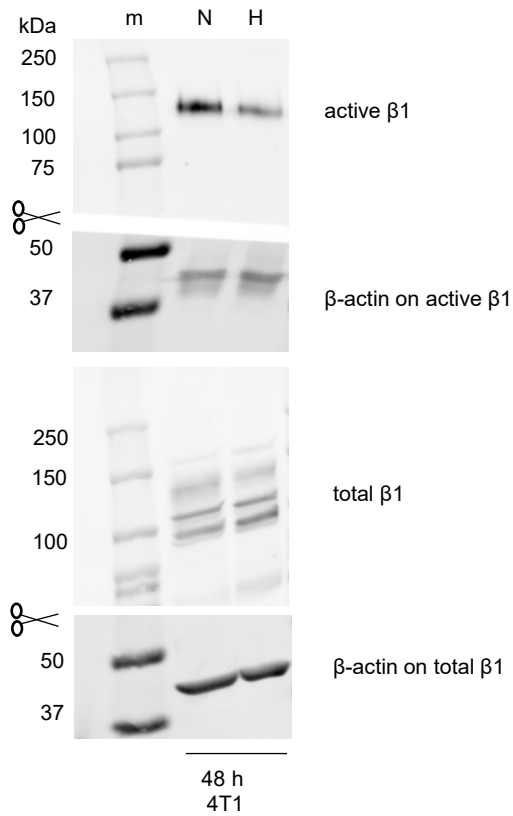

Figure 2B

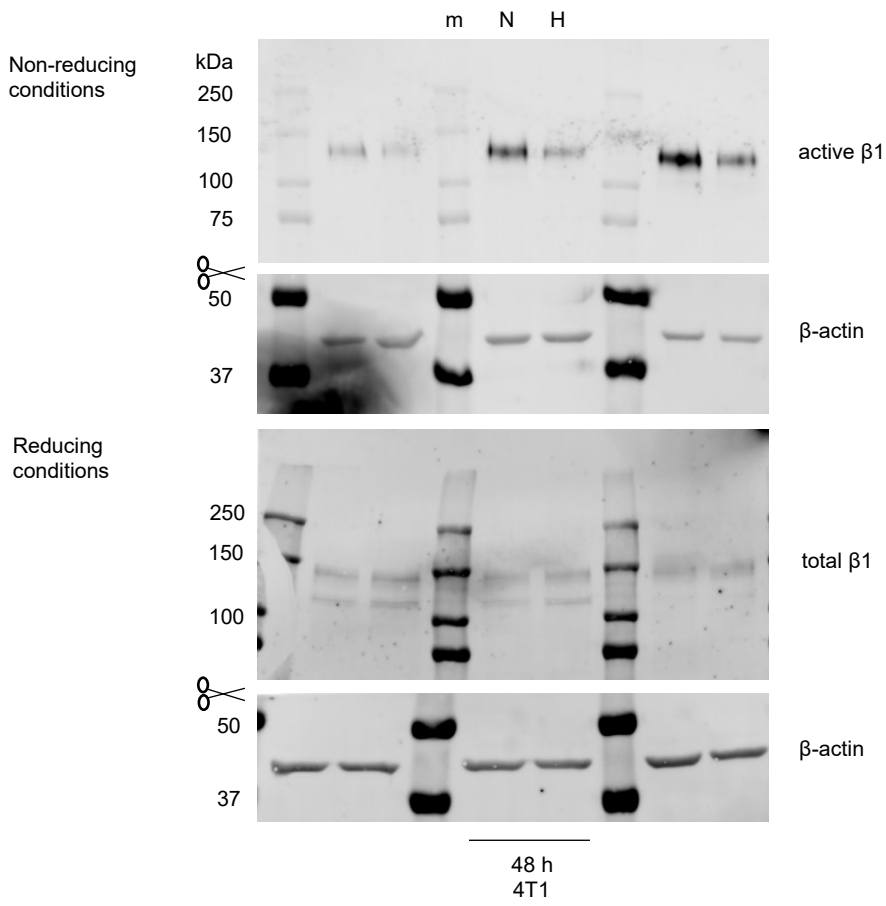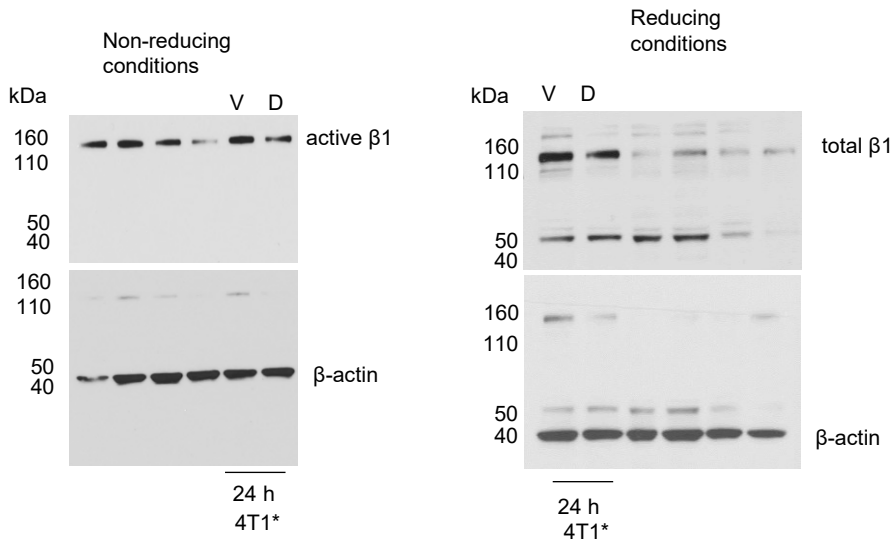

Abbreviations: N, normoxia; H, hypoxia; V, DMSO; D, DMOG; m, protein marker; \*, shown in figure, , membrane cut

Figure 2B

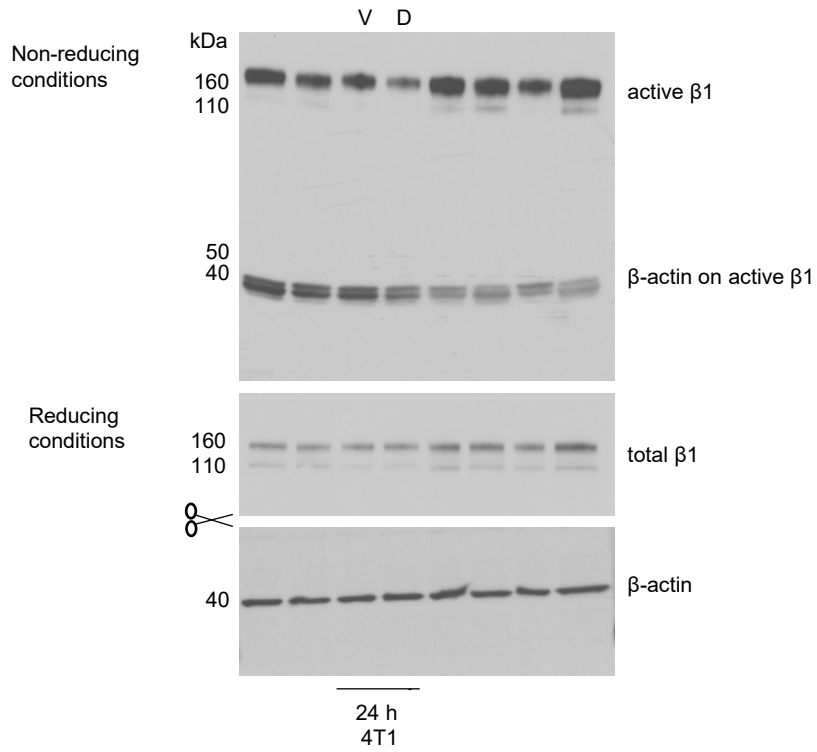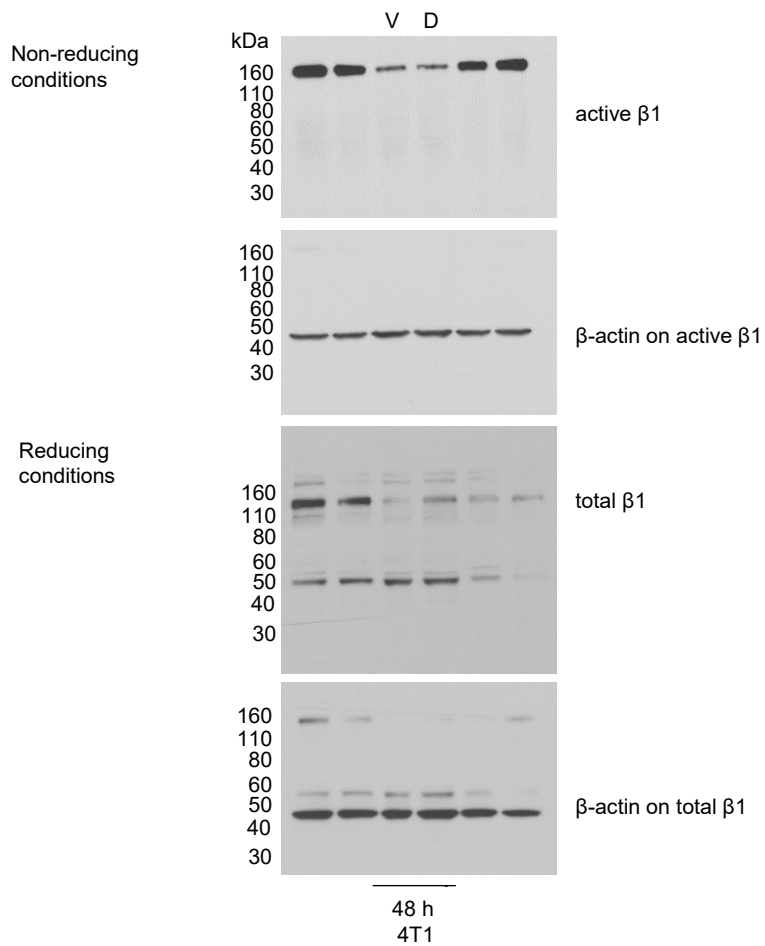

Figure 2B

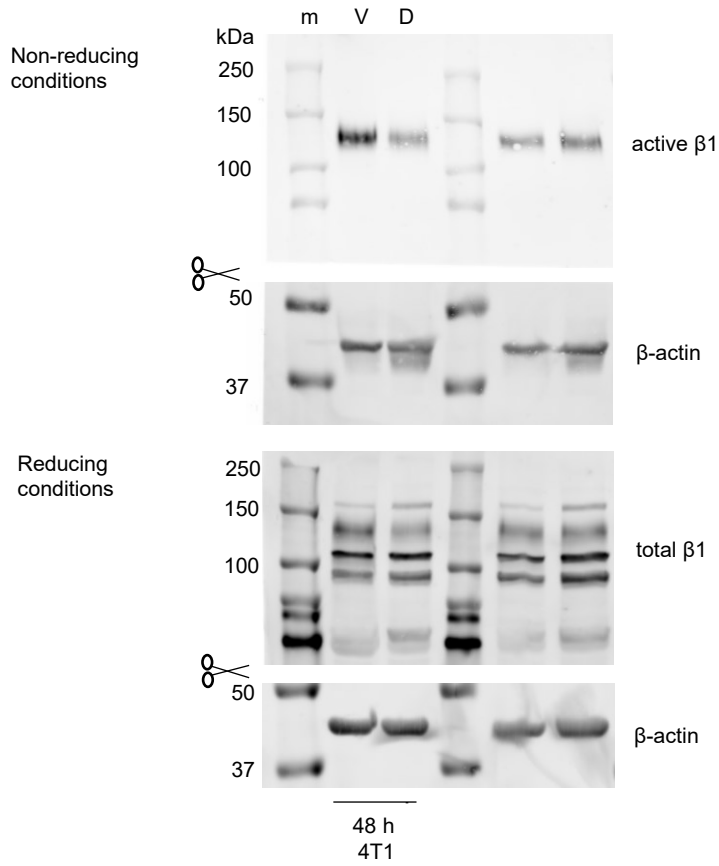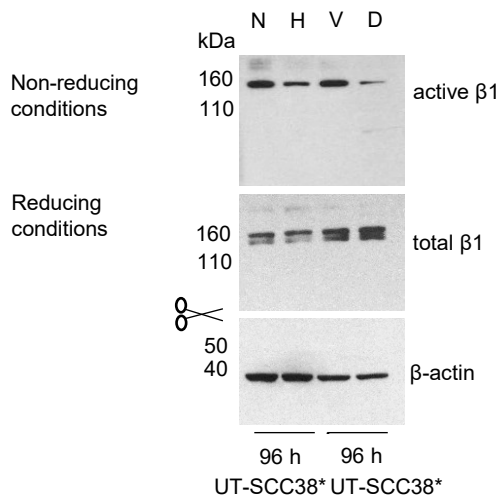

Abbreviations: N, normoxia; H, hypoxia; V, DMSO; D, DMOG; m, protein marker; \*, shown in figure, ✂, membrane cut

Figure 2B

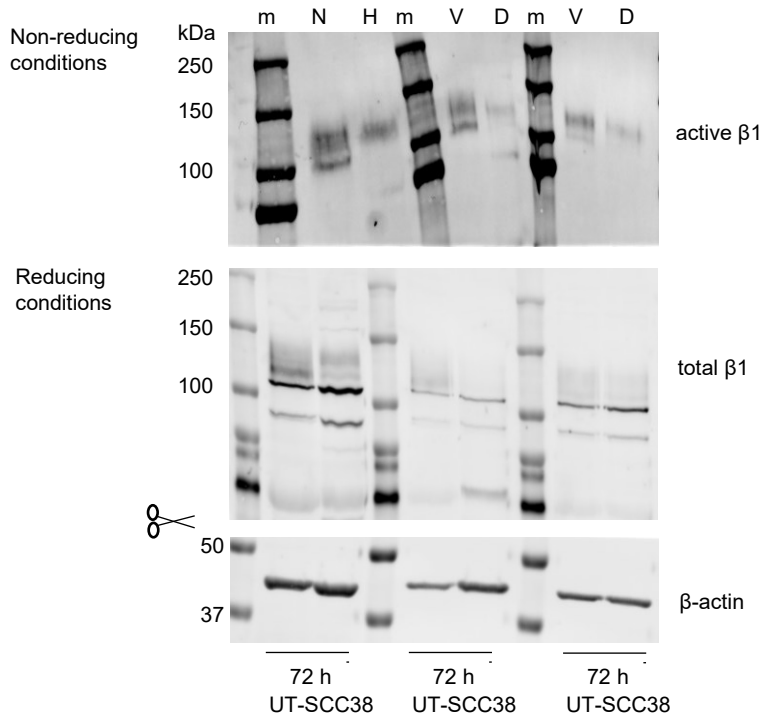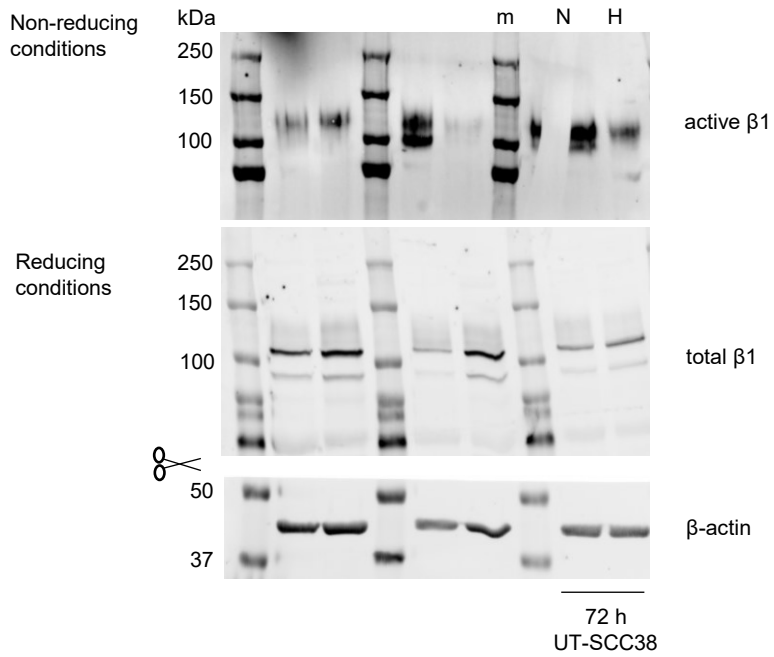

Abbreviations: N, normoxia; H, hypoxia; V, DMSO; D, DMOG; m, protein marker; \*, shown in figure, ✂, membrane cut



Figure 2B

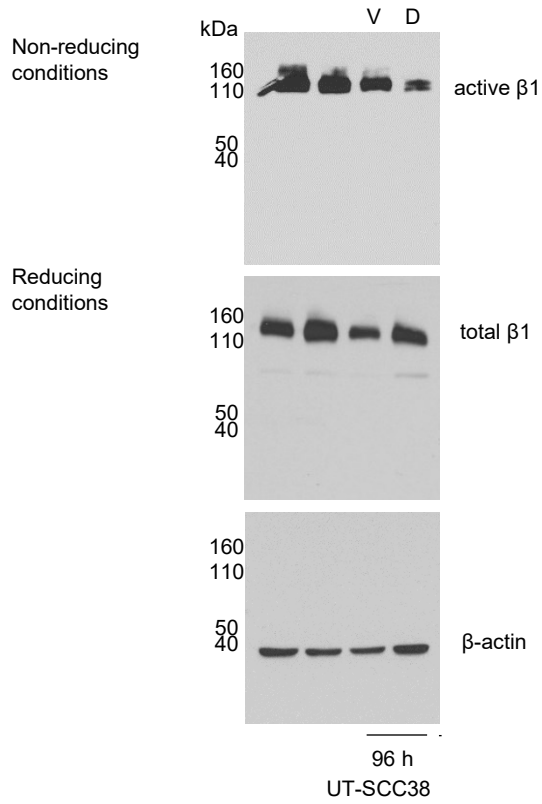

Abbreviations: N, normoxia; H, hypoxia; V, DMSO; D, DMOG; m, protein marker; \*, shown in figure, , membrane cut

Figure S3A

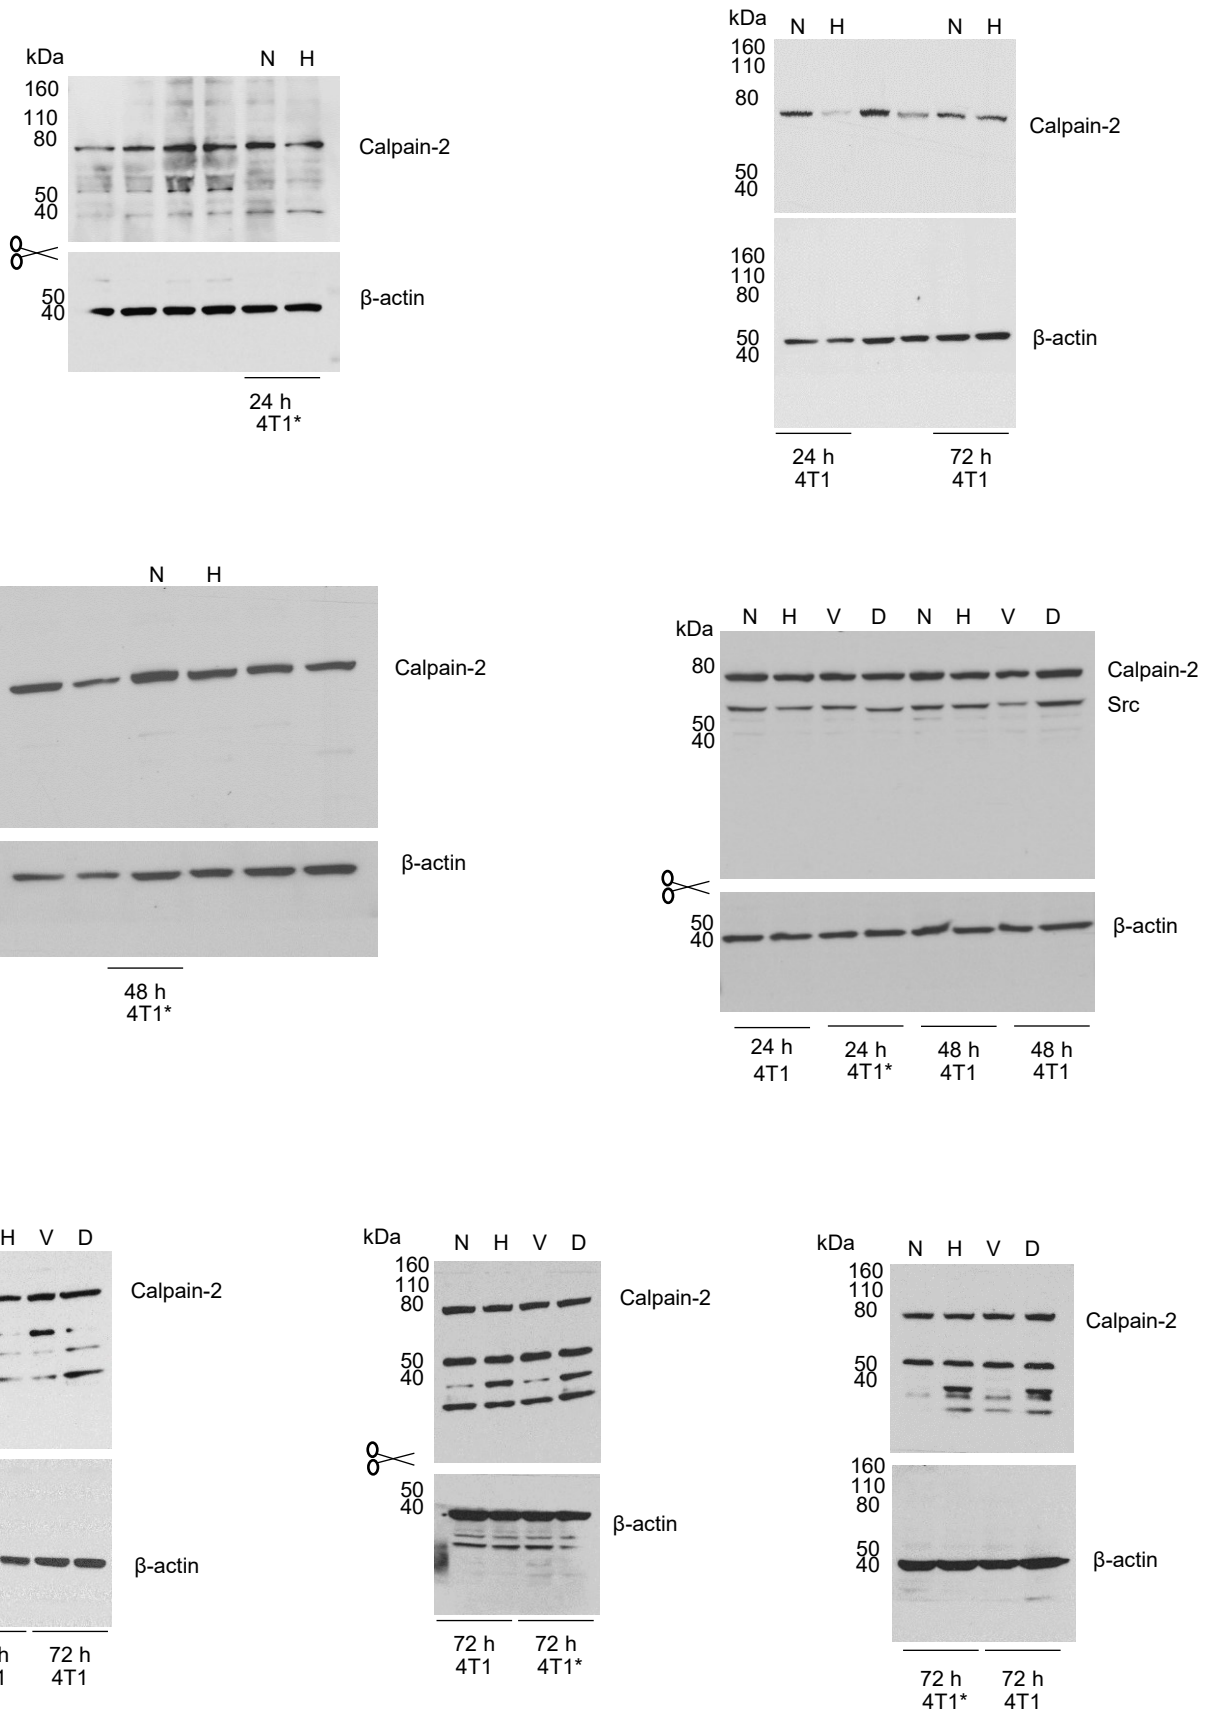

Abbreviations: N, normoxia; H, hypoxia; V, DMSO; D, DMOG; m, protein marker; \*, shown in figure, , membrane cut

Figure S3A

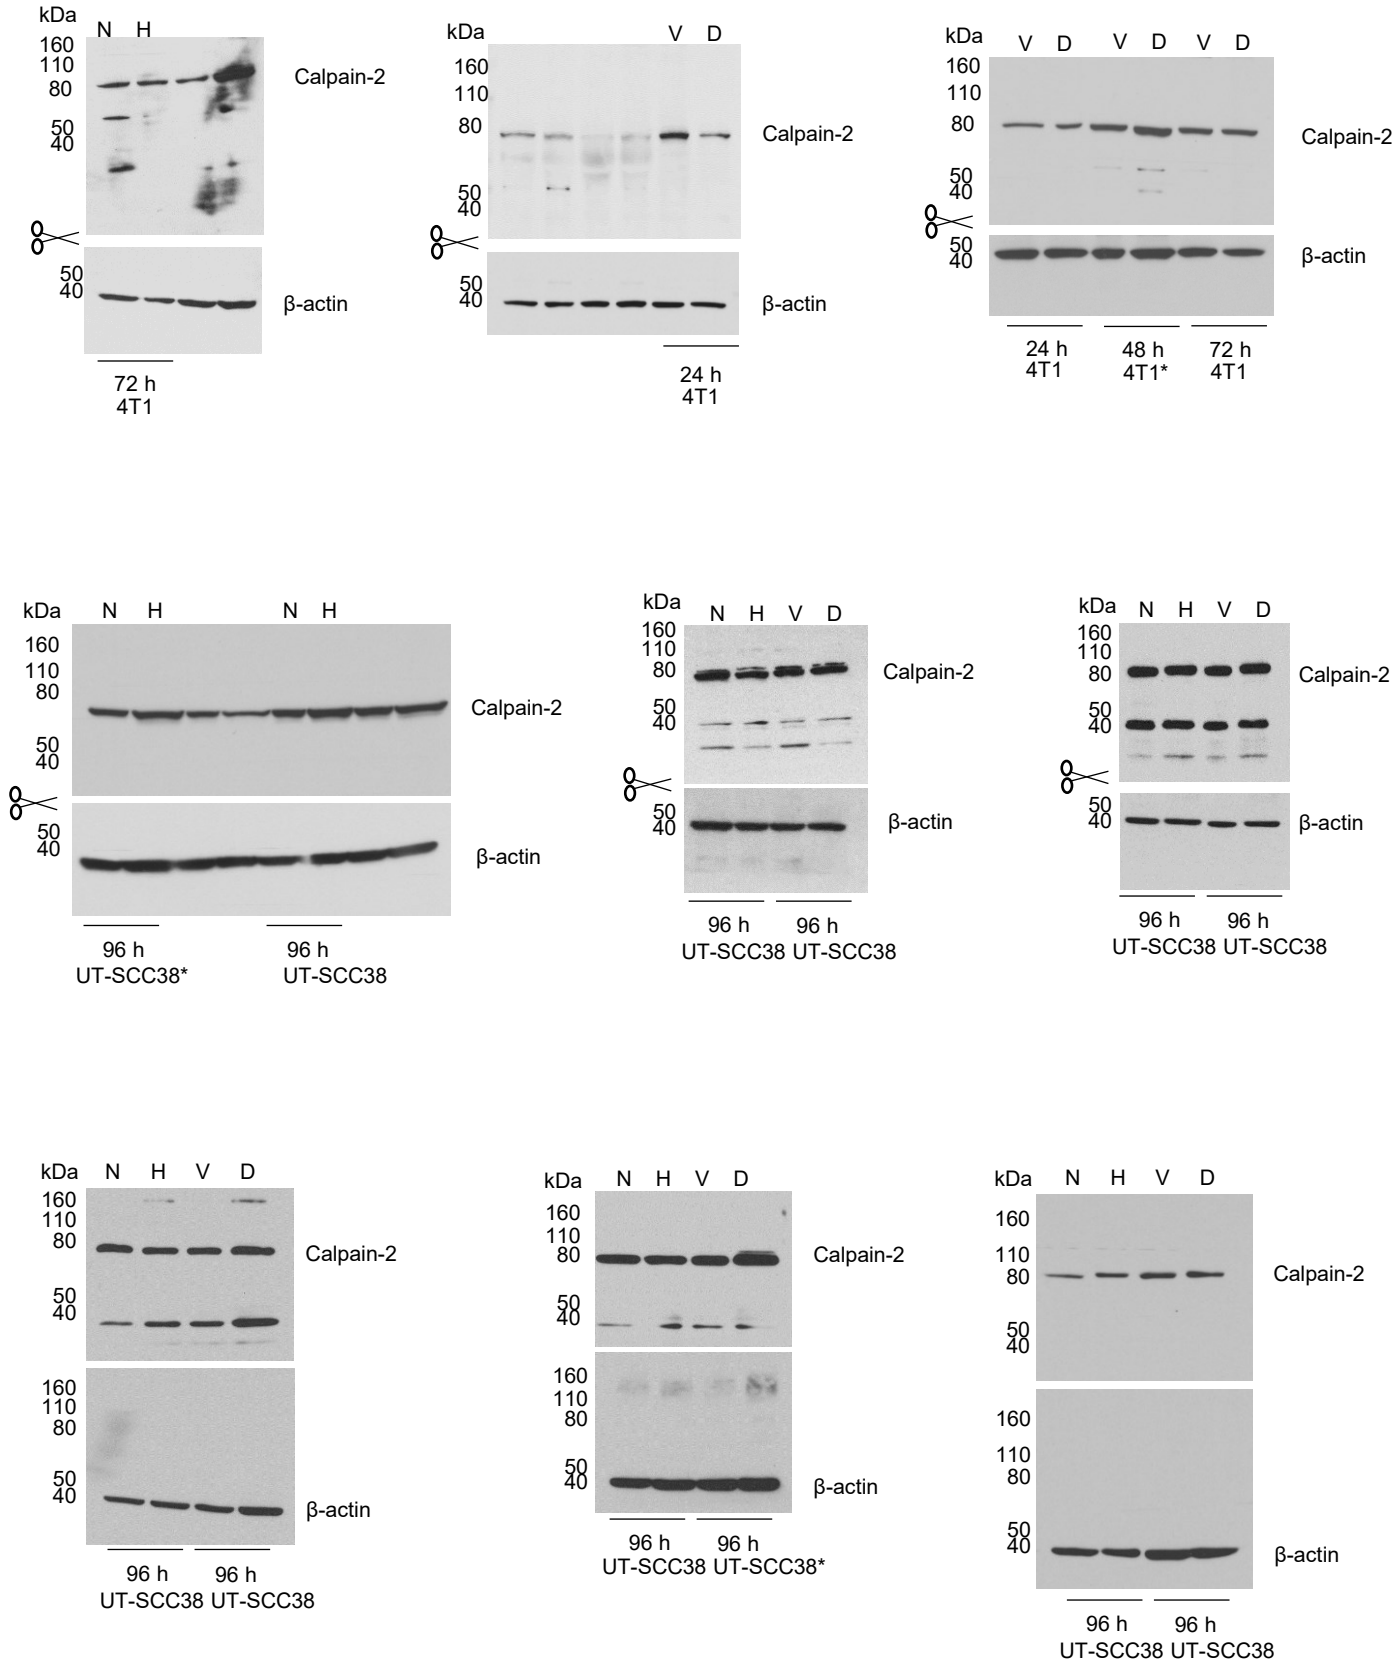

Abbreviations: N, normoxia; H, hypoxia; V, DMSO; D, DMOG; m, protein marker; \*, shown in figure, , membrane cut

Figure S3E

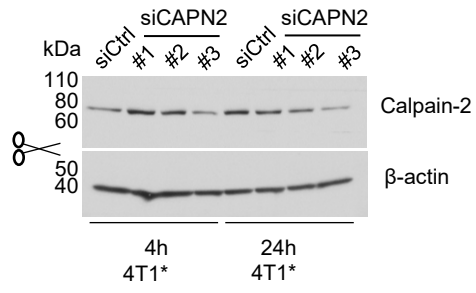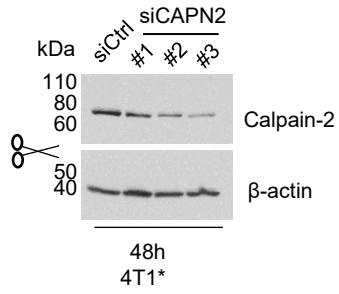

Abbreviations: N, normoxia; H, hypoxia; V, DMSO; D, DMOG; m, protein marker; \*, shown in figure, , membrane cut

Figure S3F

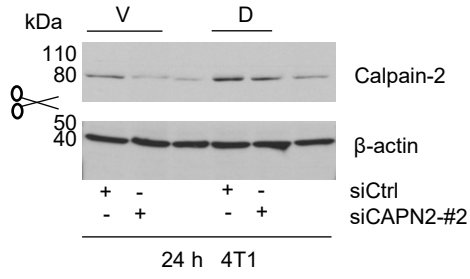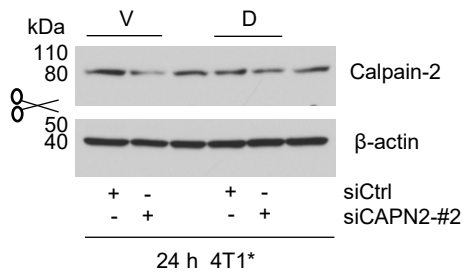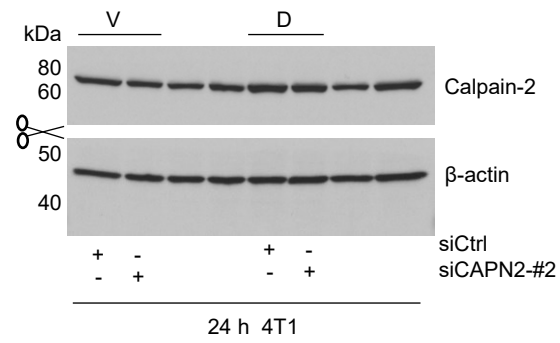

Abbreviations: N, normoxia; H, hypoxia; V, DMSO; D, DMOG; m, protein marker; \*, shown in figure, , membrane cut

Figure S3G

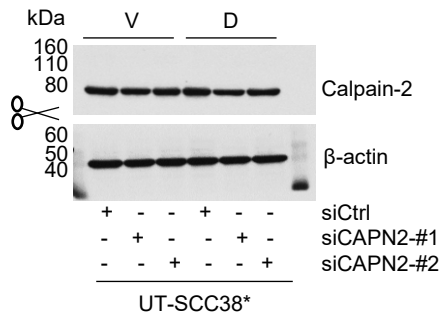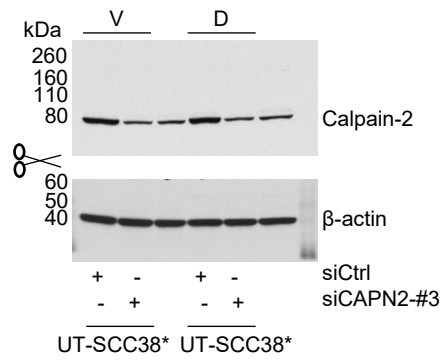

Abbreviations: N, normoxia; H, hypoxia; V, DMSO; D, DMOG; m, protein marker; \*, shown in figure, , membrane cut

Figure 4A

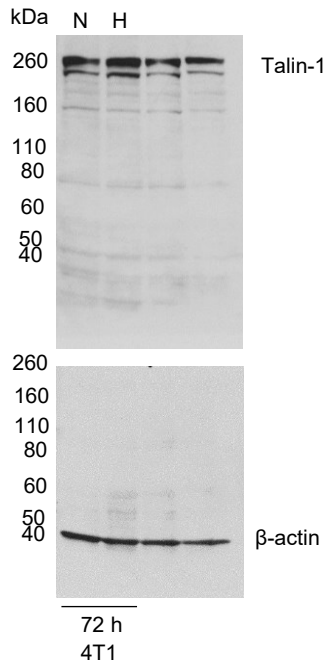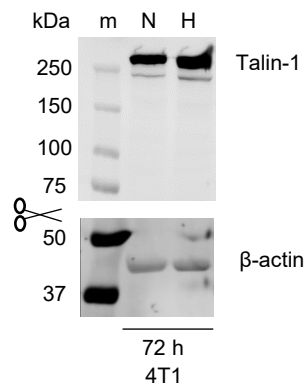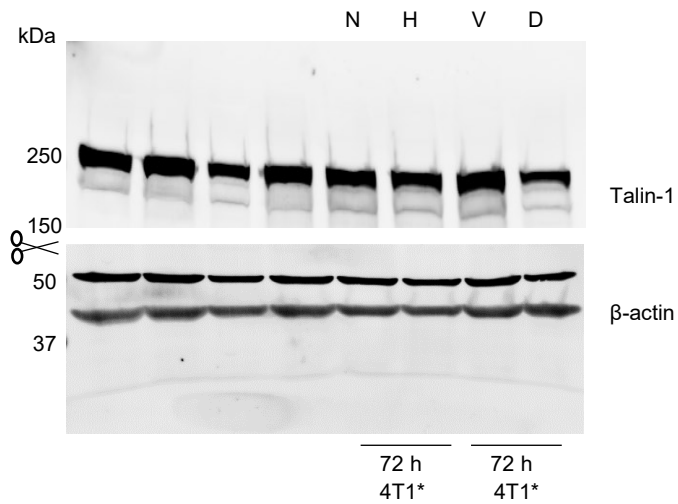

Abbreviations: N, normoxia; H, hypoxia; V, DMSO; D, DMOG; m, protein marker; \*, shown in figure, , membrane cut

Figure 4A

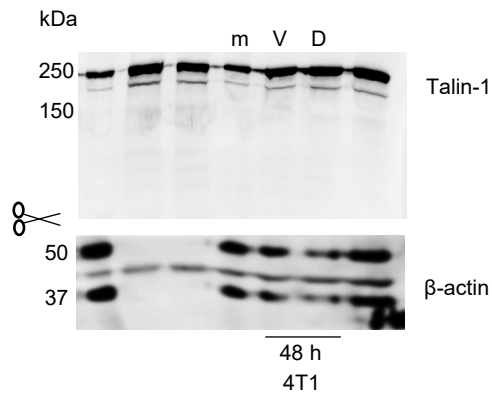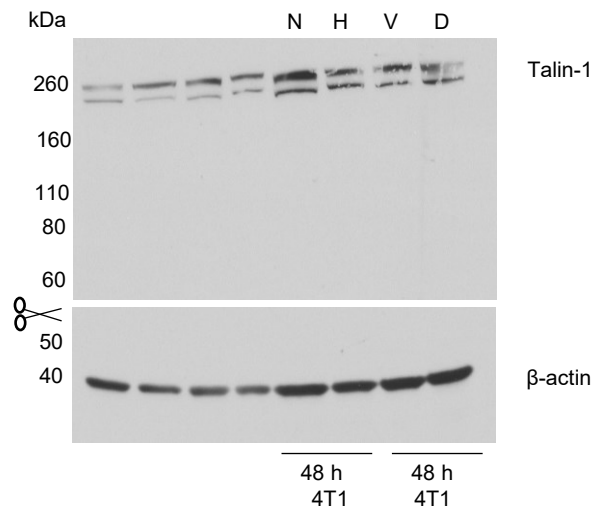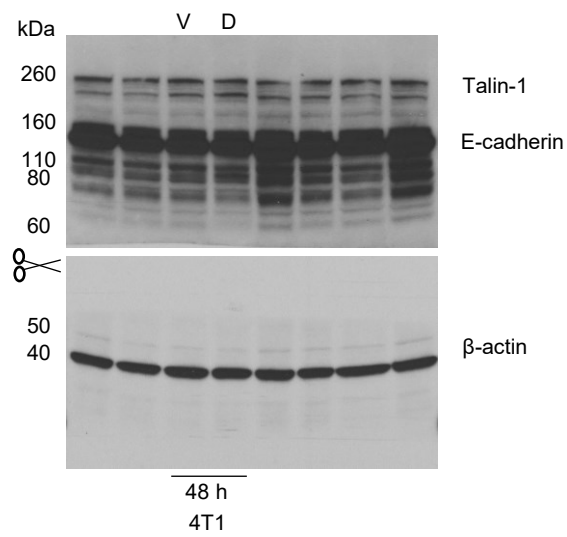

Abbreviations: N, normoxia; H, hypoxia; V, DMSO; D, DMOG; m, protein marker; \*, shown in figure, ✂, membrane cut



Figure 4A

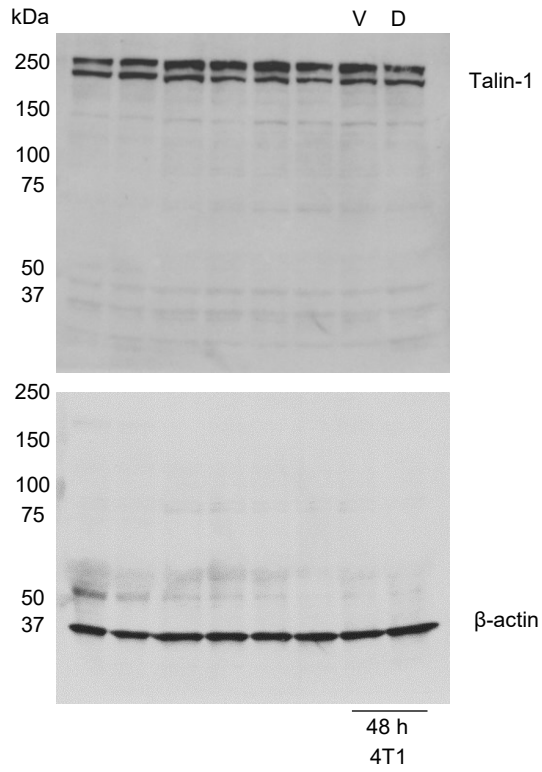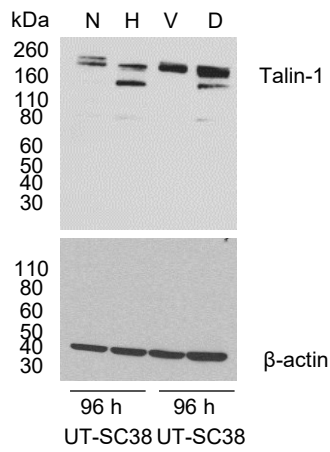

Abbreviations: N, normoxia; H, hypoxia; V, DMSO; D, DMOG; m, protein marker; \*, shown in figure, , membrane cut

Figure 4A

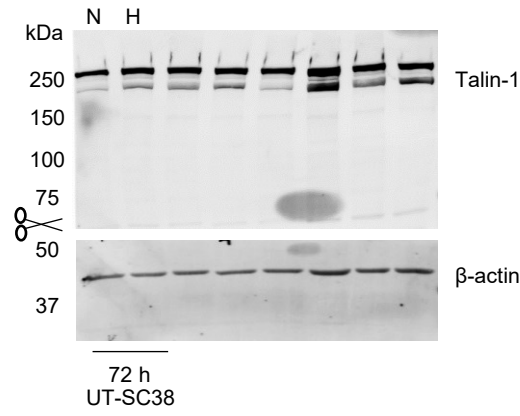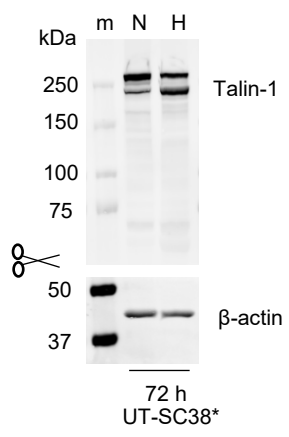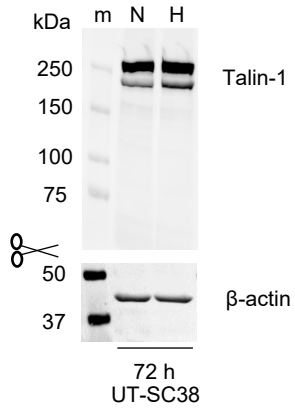

Abbreviations: N, normoxia; H, hypoxia; V, DMSO; D, DMOG; m, protein marker; \*, shown in figure, ✂, membrane cut

Figure 4A

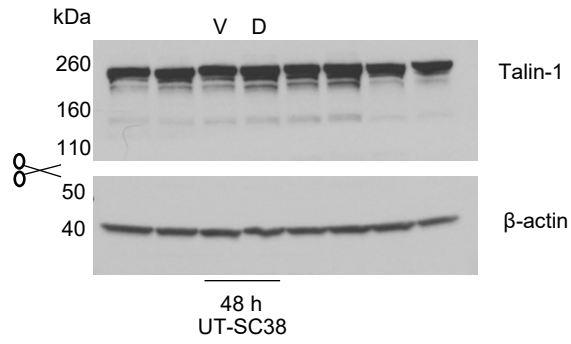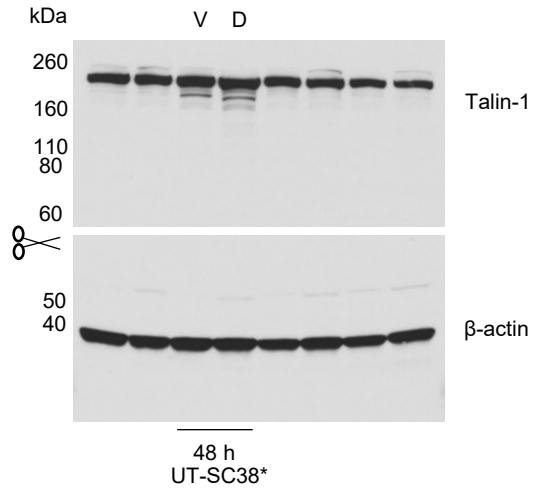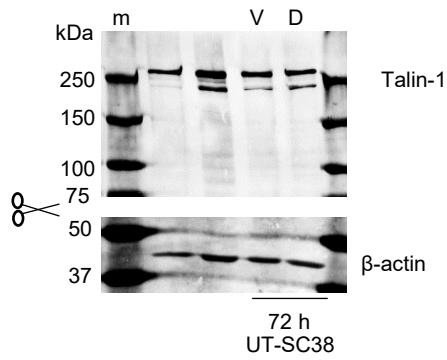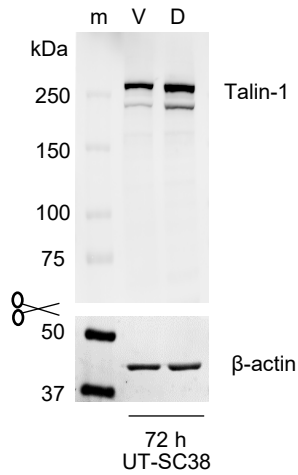

Figure 4B

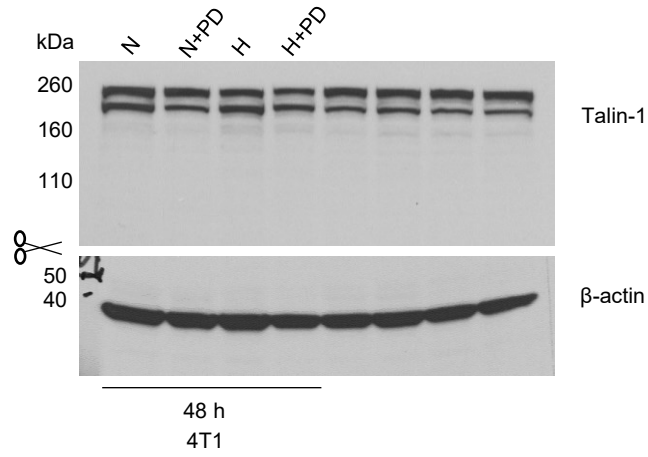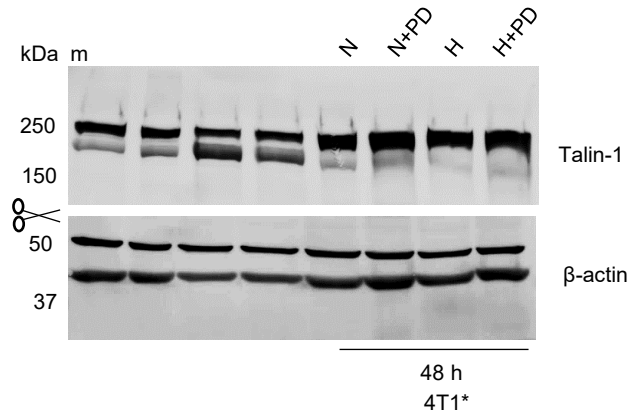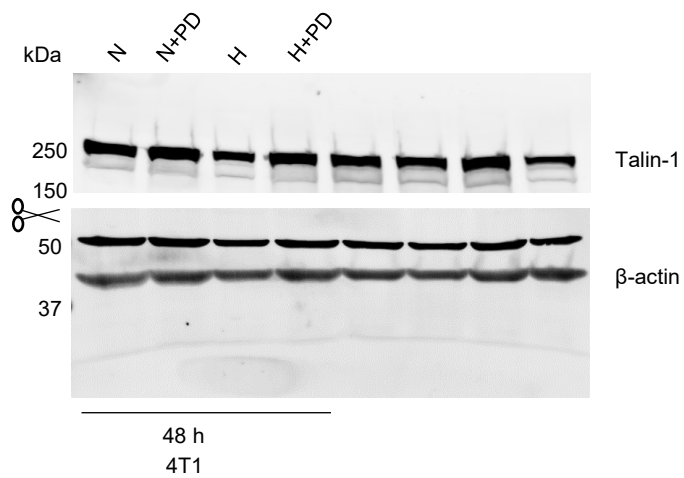

Abbreviations: N, normoxia; H, hypoxia; V, DMSO; D, DMOG; PD, PD150606; m, protein marker; \*, shown in figure, , membrane cut

Figure 4B

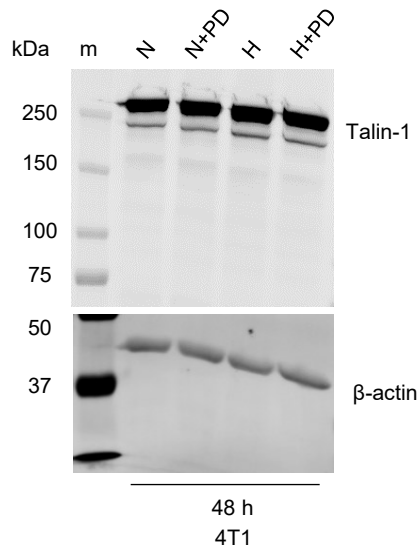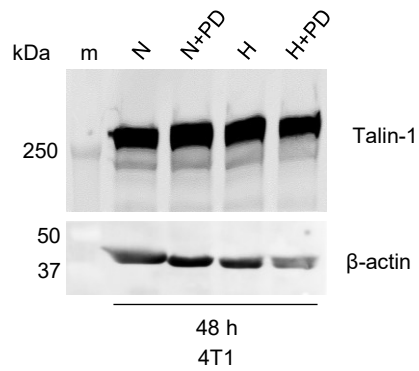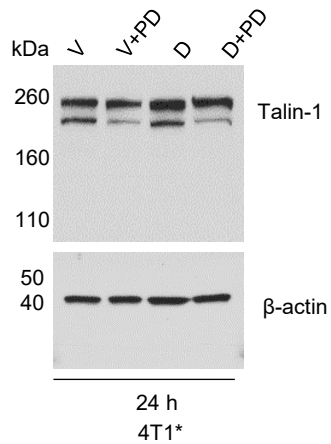

Abbreviations: N, normoxia; H, hypoxia; V, DMSO; D, DMOG; PD, PD150606; m, protein marker; \*, shown in figure, , membrane cut

Figure 4B

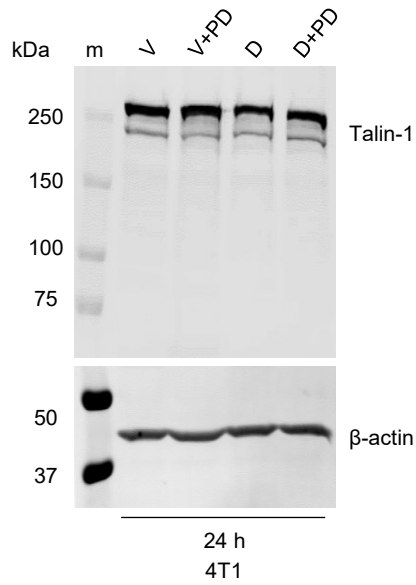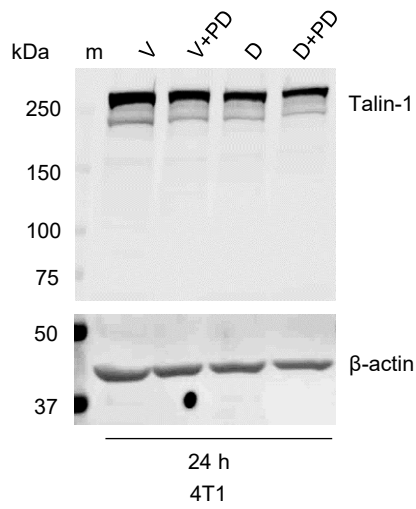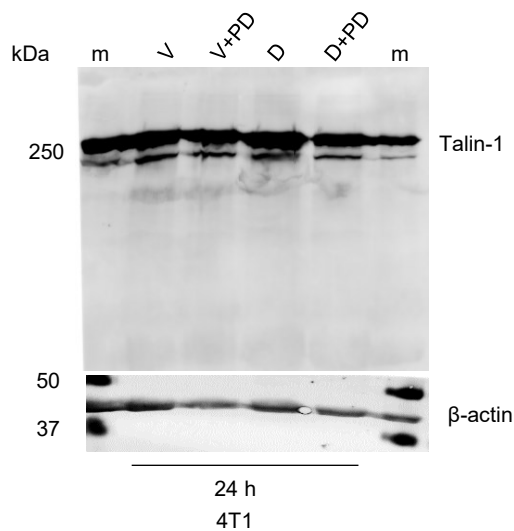

Abbreviations: N, normoxia; H, hypoxia; V, DMSO; D, DMOG; PD, PD150606; m, protein marker; \*, shown in figure, ✂, membrane cut

Figure 4B

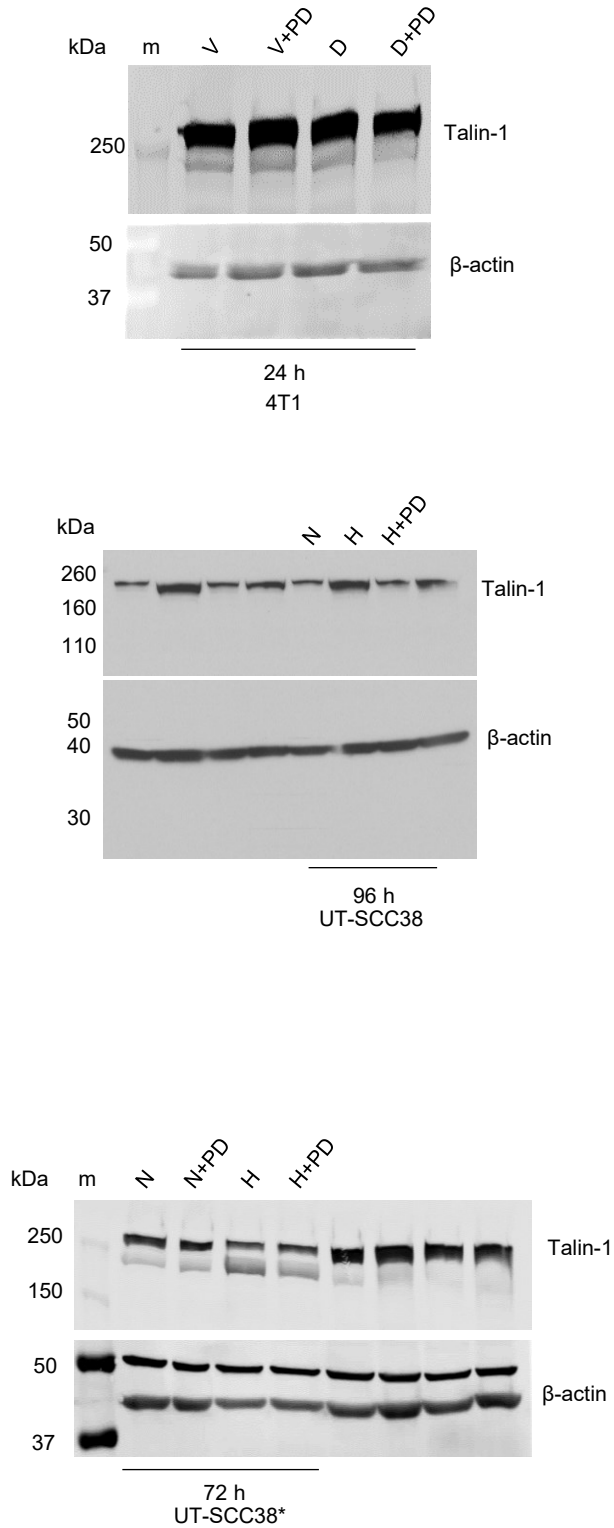

Abbreviations: N, normoxia; H, hypoxia; V, DMSO; D, DMOG; PD, PD150606; m, protein marker; \*, shown in figure, , membrane cut

Figure 4B

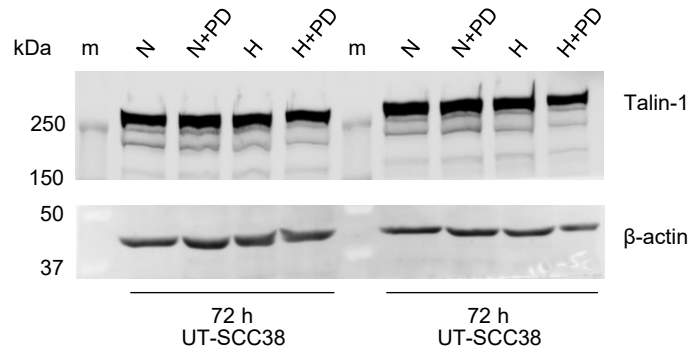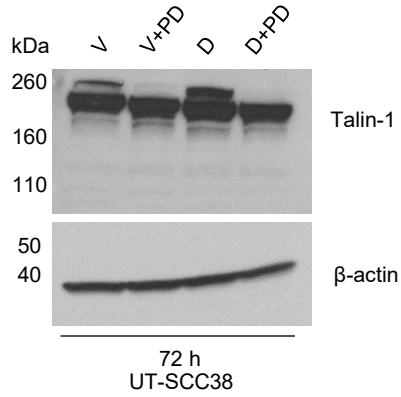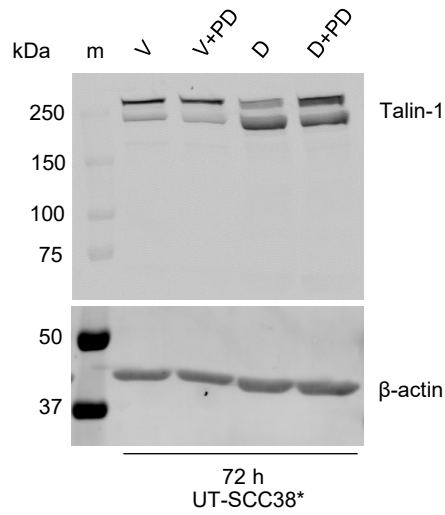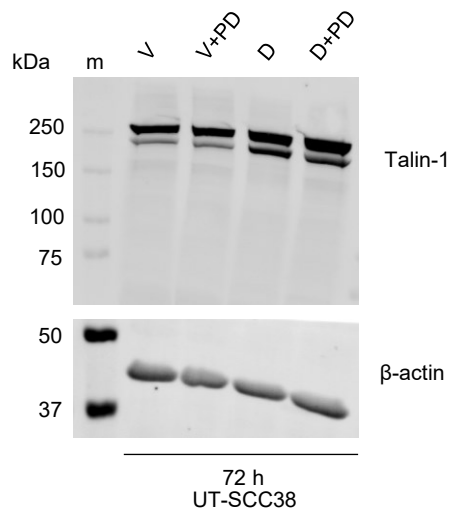

Abbreviations: N, normoxia; H, hypoxia; V, DMSO; D, DMOG; PD, PD150606; m, protein marker; \*, shown in figure, , membrane cut



Figure 4C

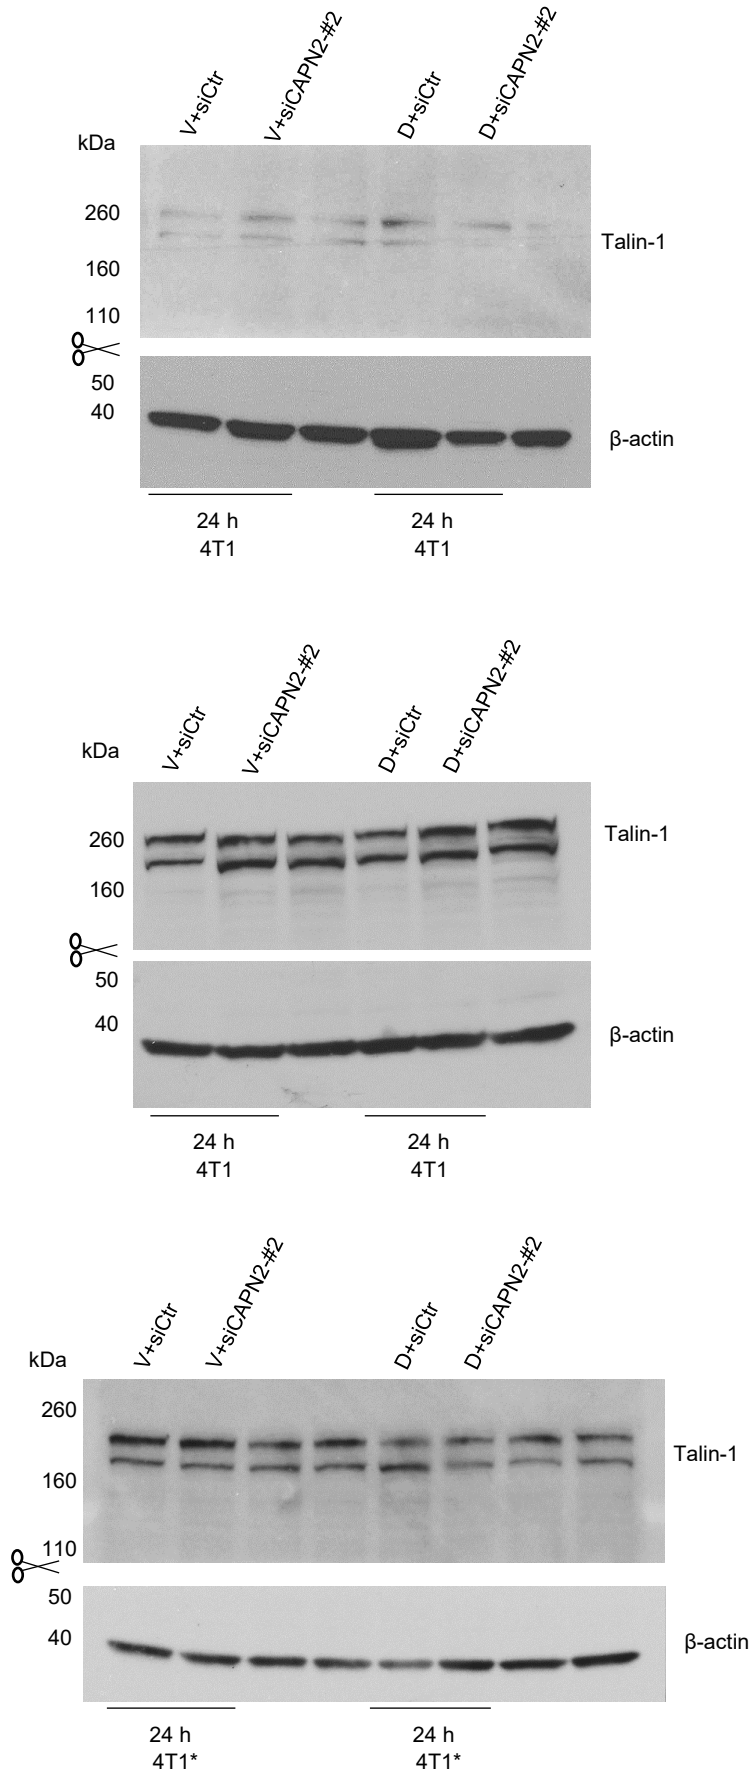

Figure S4A

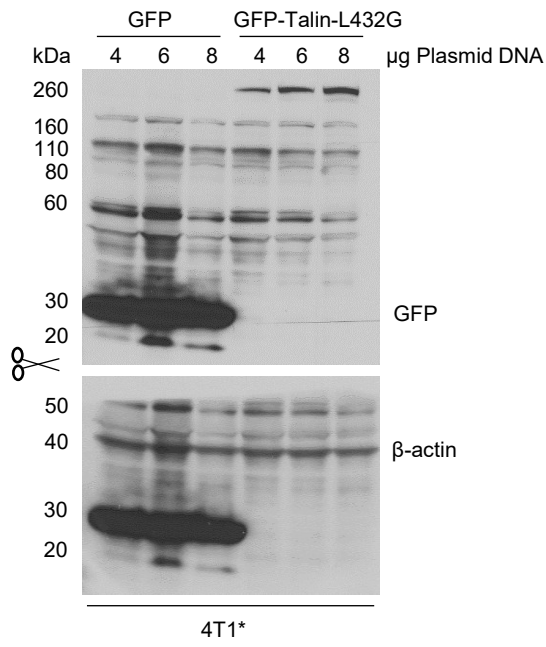

Figure S4B

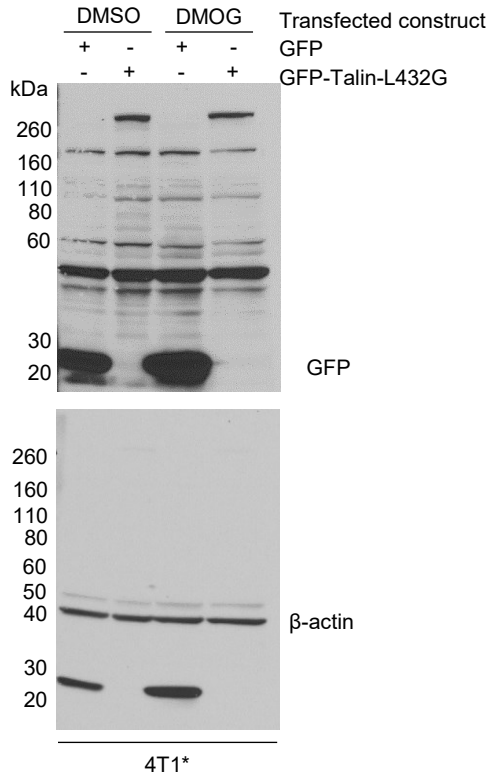

Supplement: NIHMS1764289-supplement-1.pdf [file NIHMS1764289-supplement-1.pdf]
